# Supplementary material for: Investigation of the Spatio-Temporal Behaviour of Submarine Groundwater Discharge Using a Low-Cost Multi-Sensor-Platform
Source: MDPI journal article supplement (doi:10.3390/jmse9080802), 2021-07-26

## Supplementary Material

**Figure S1.** Echograms of sonar transects with identified plumes

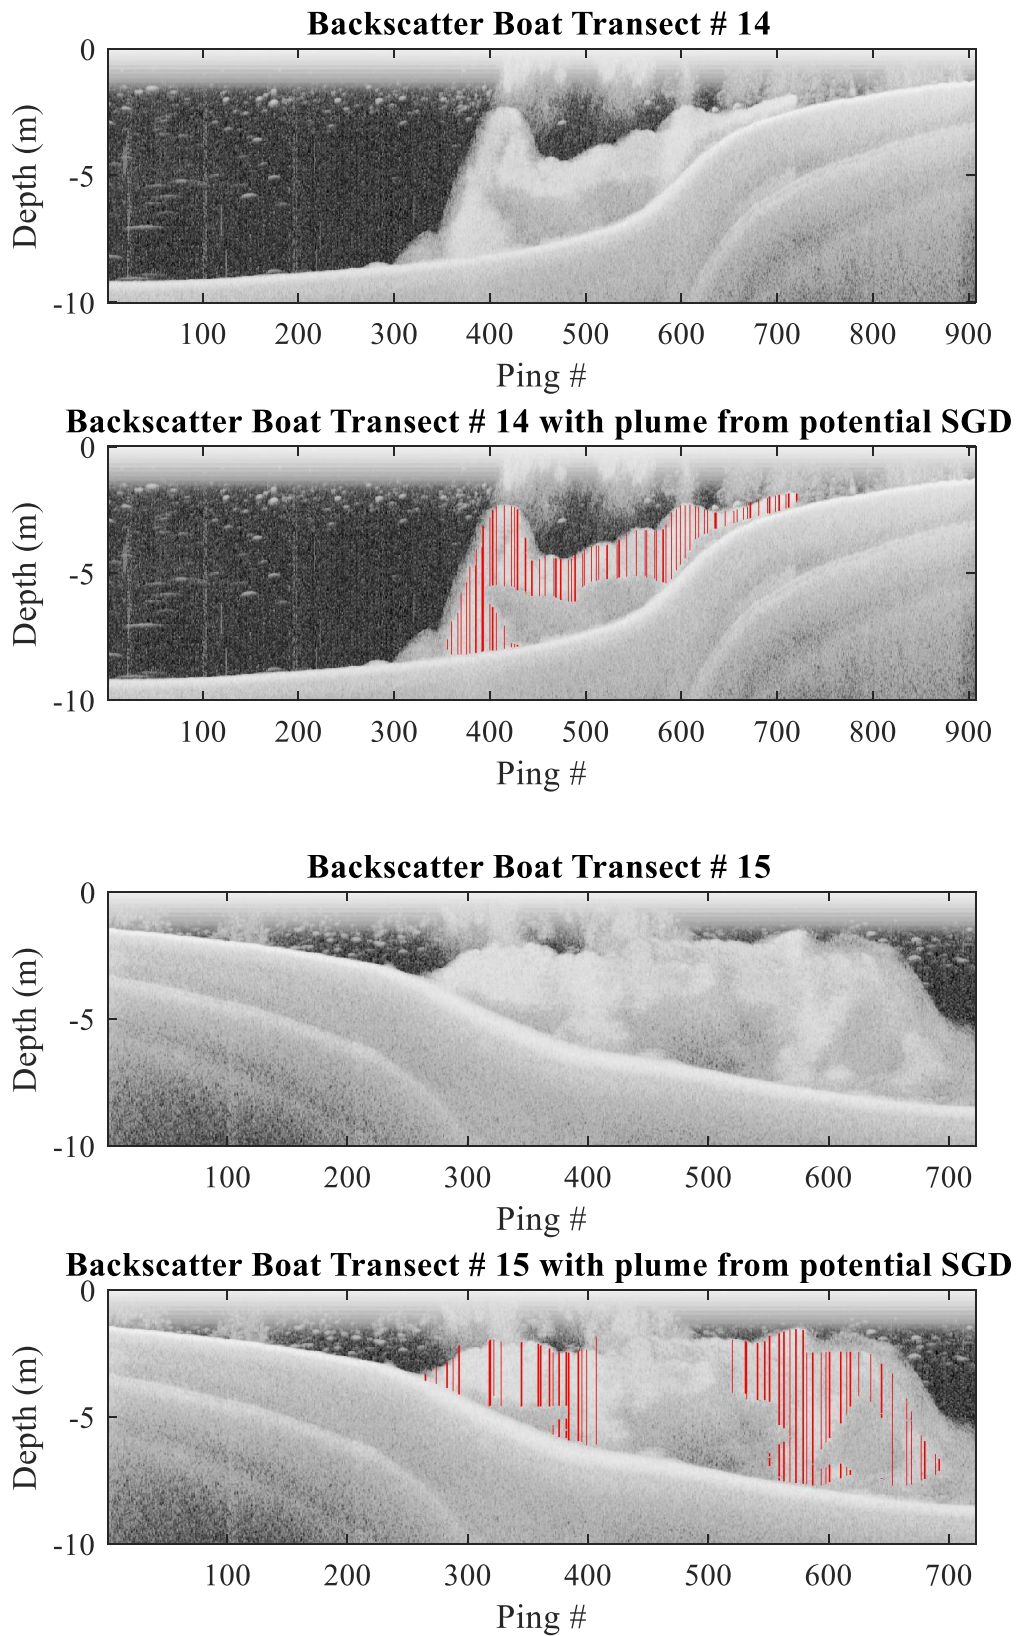

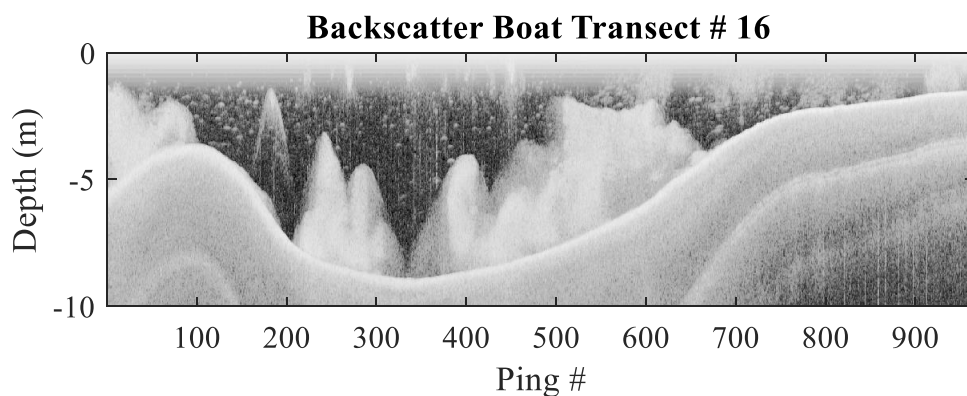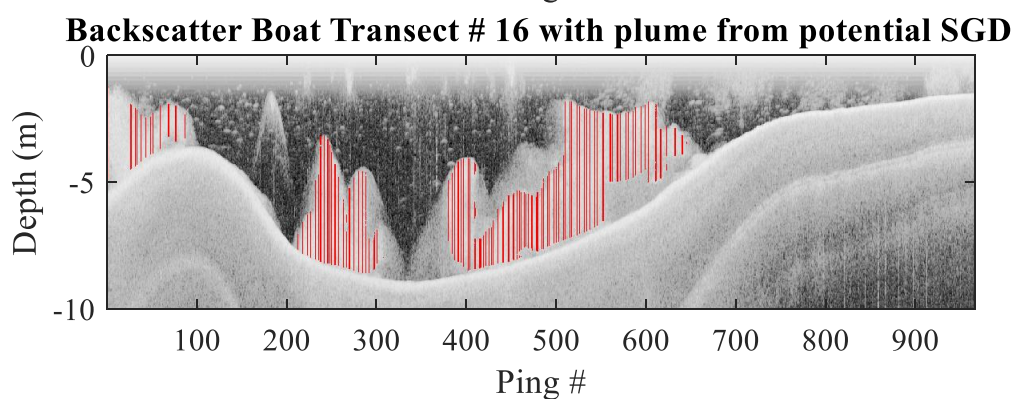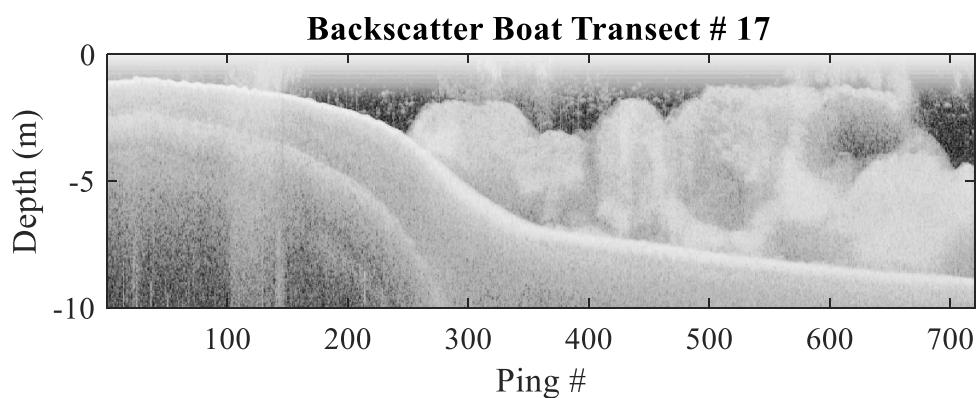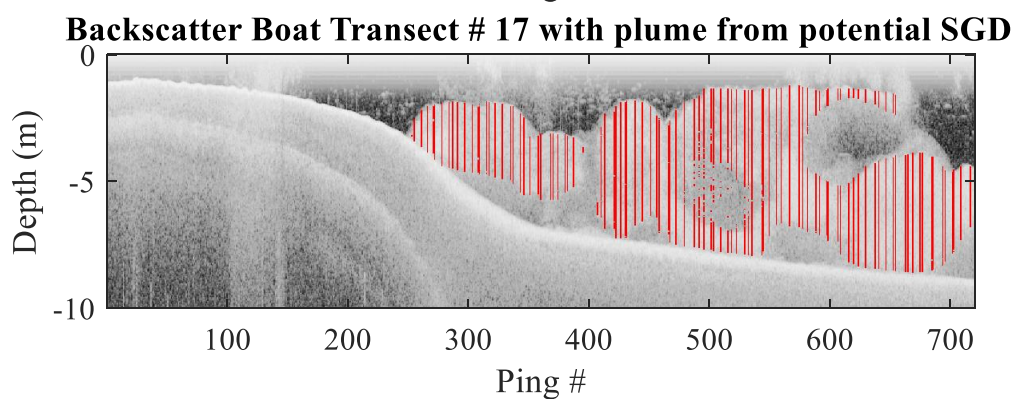

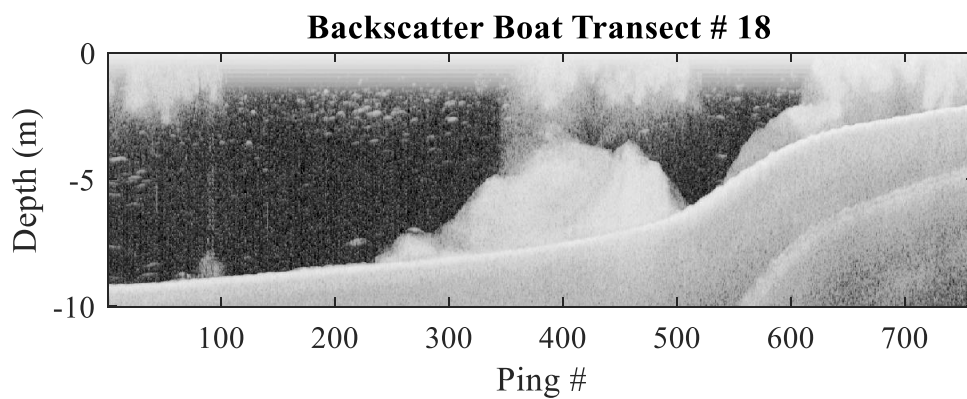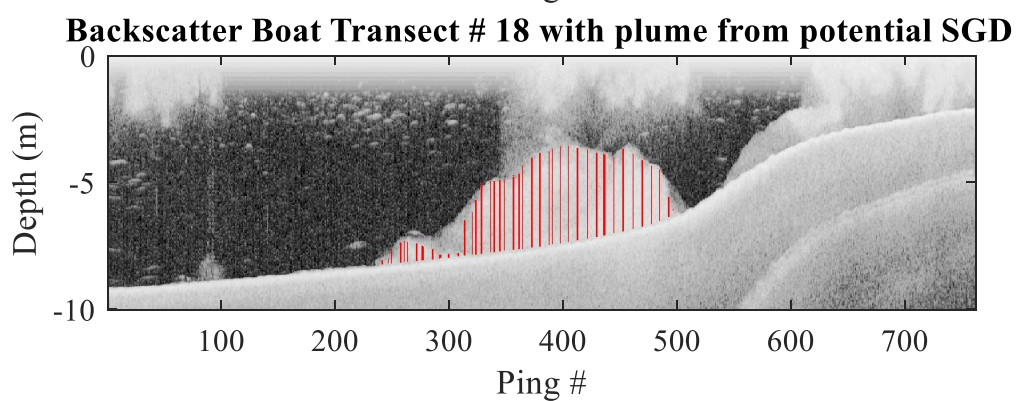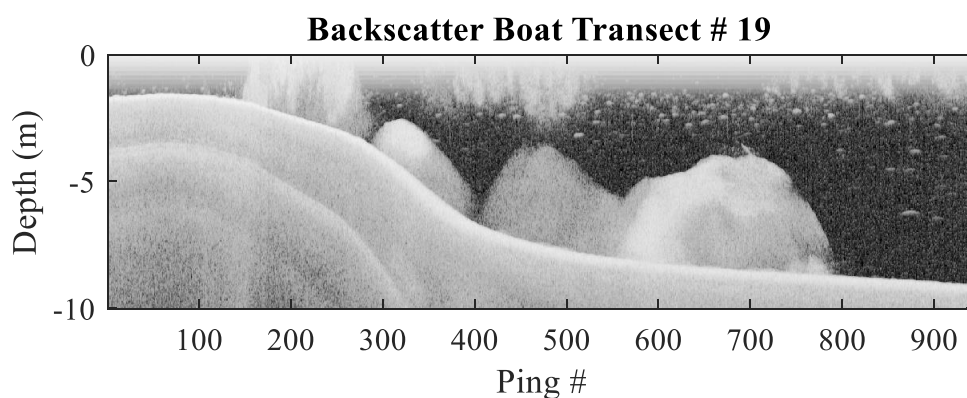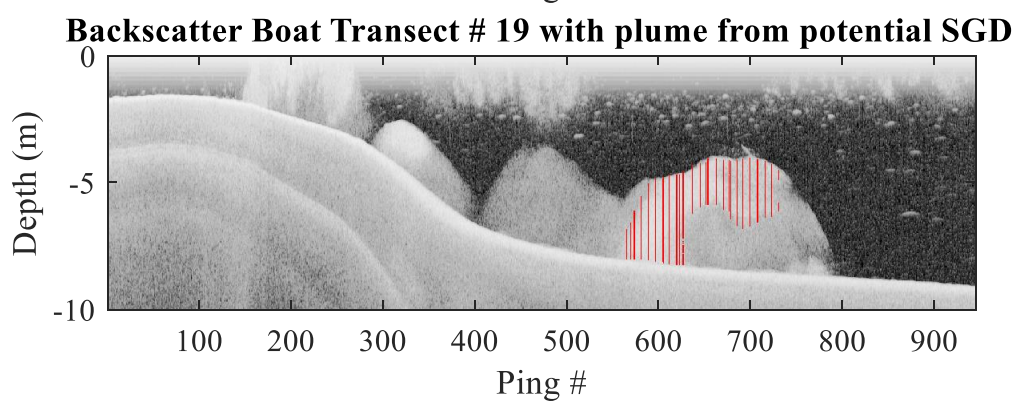

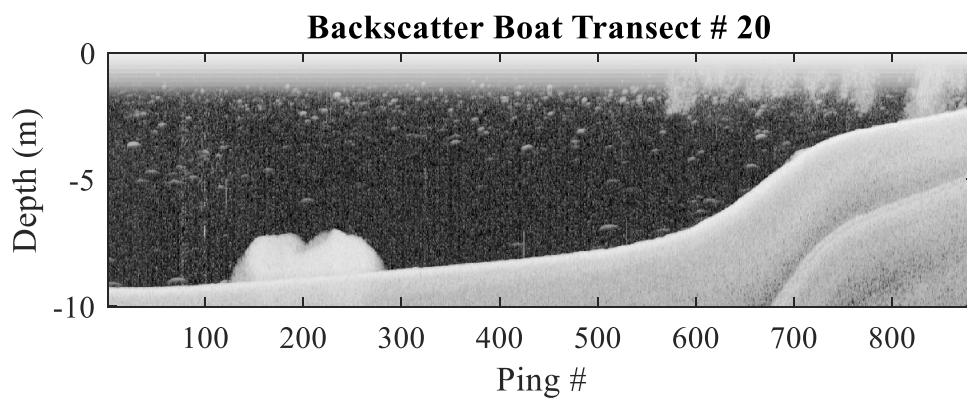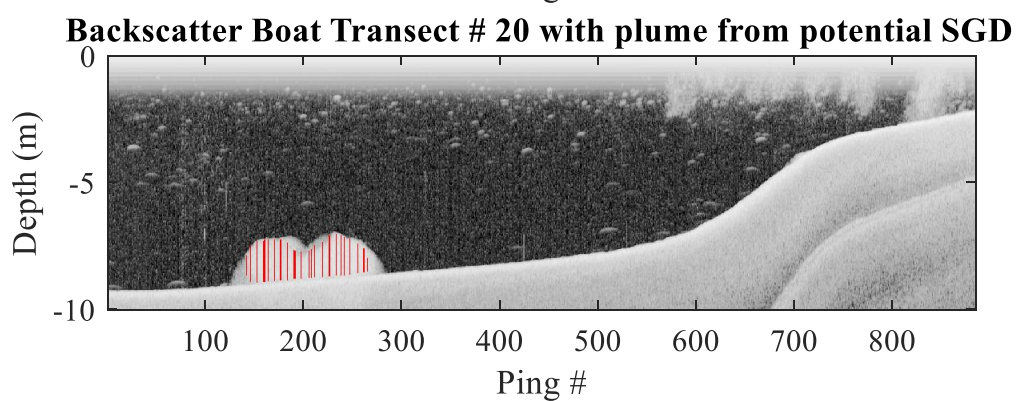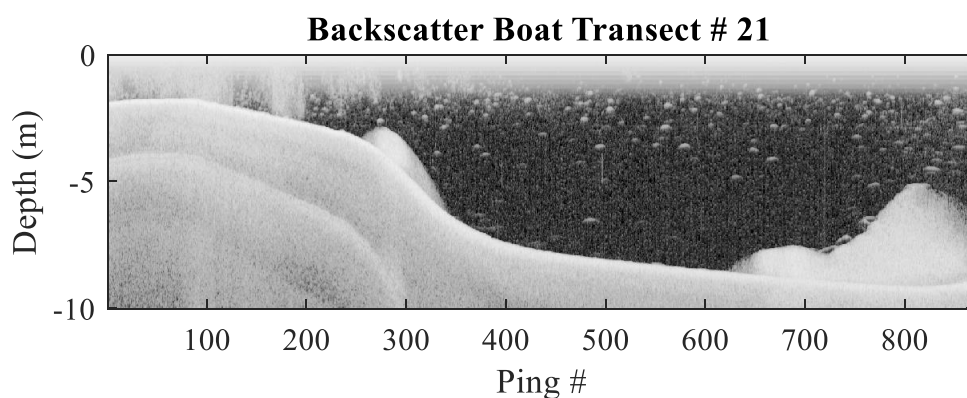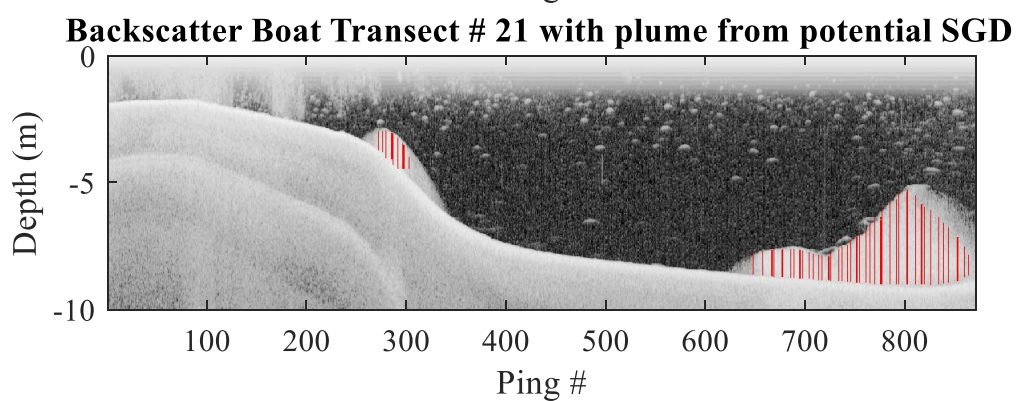

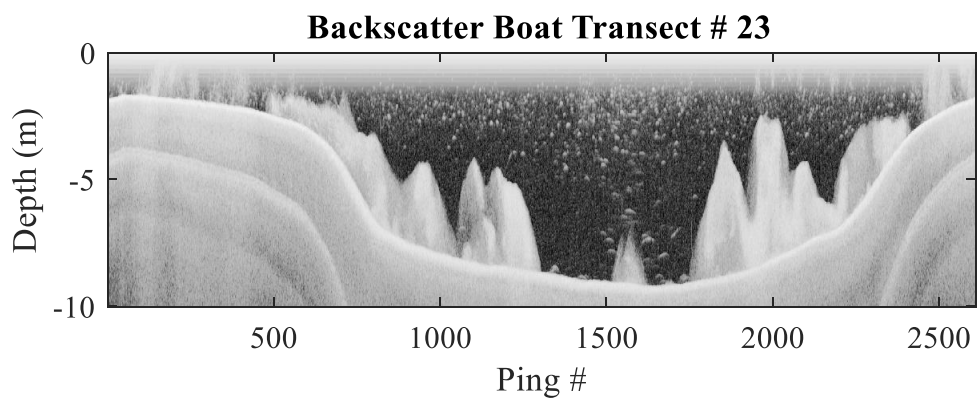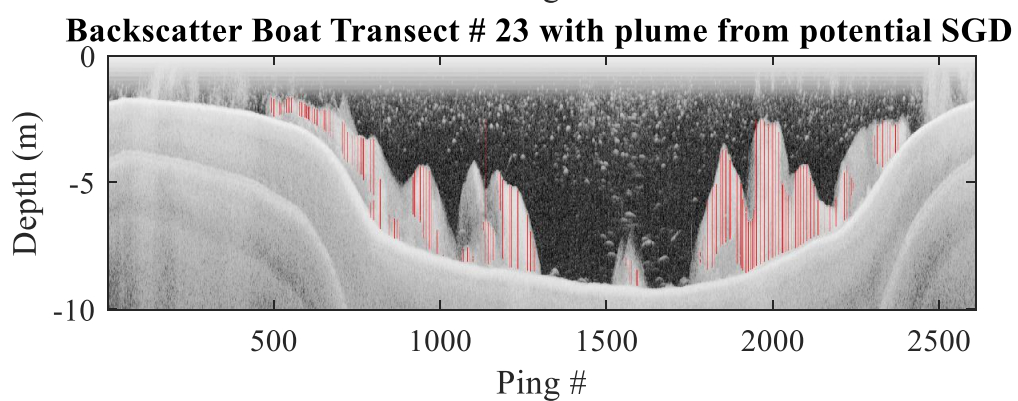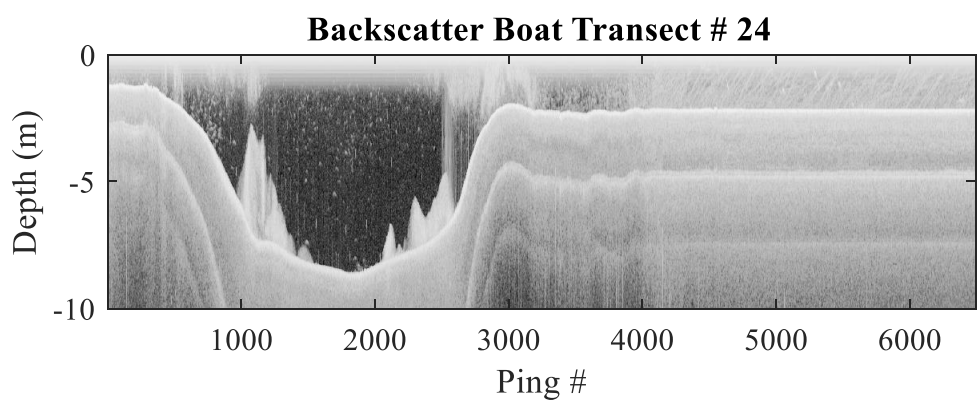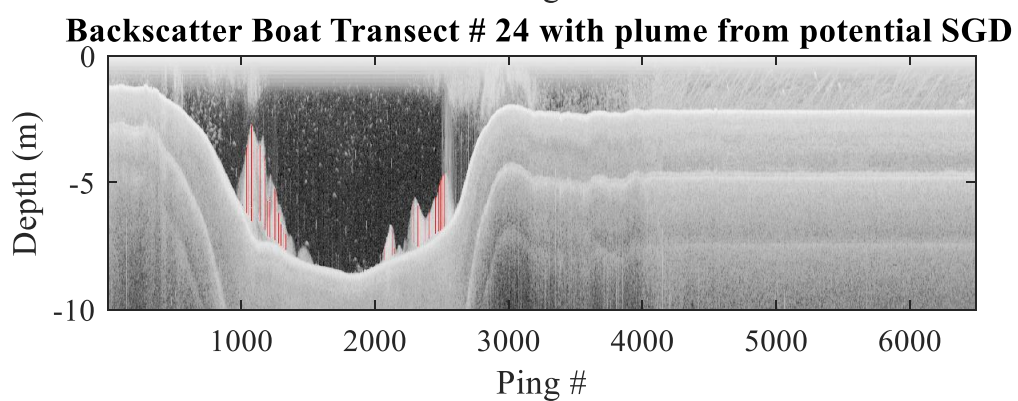

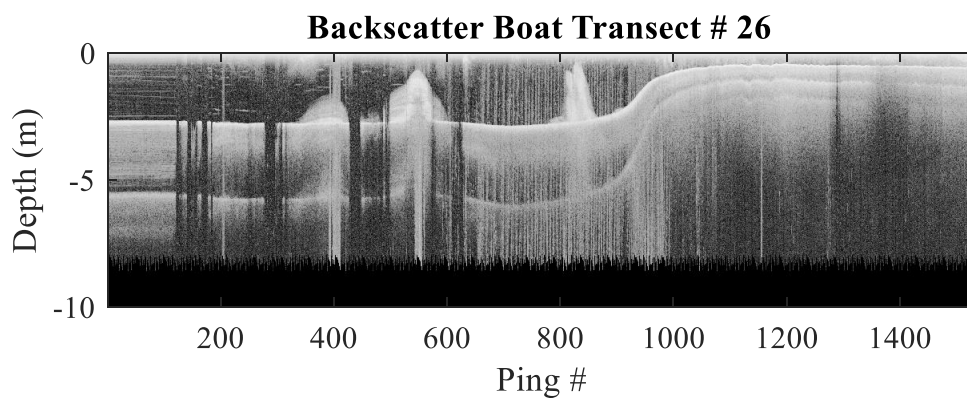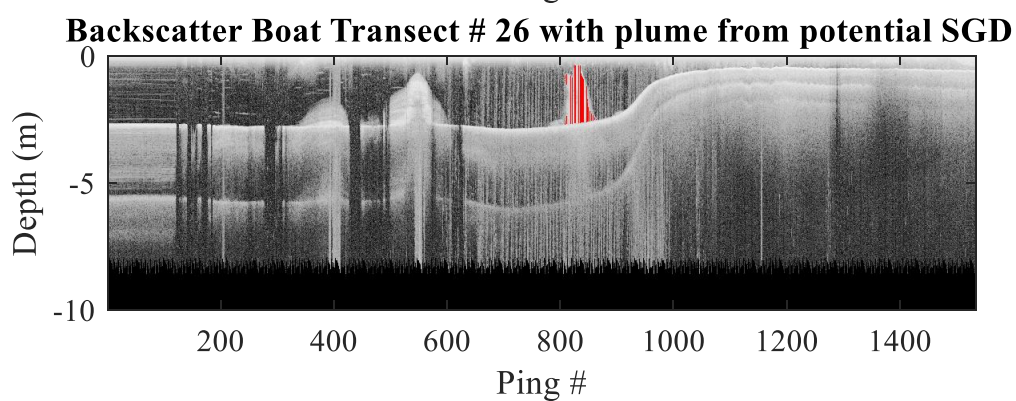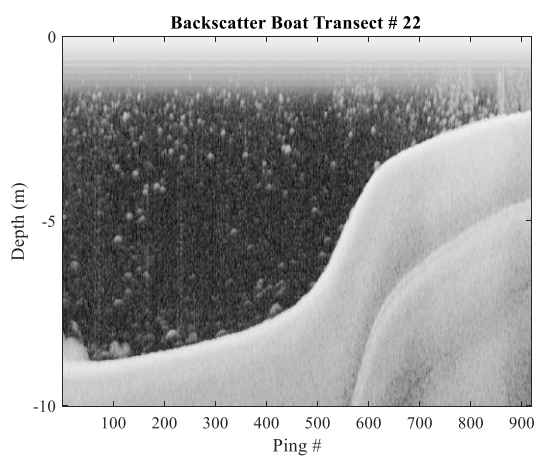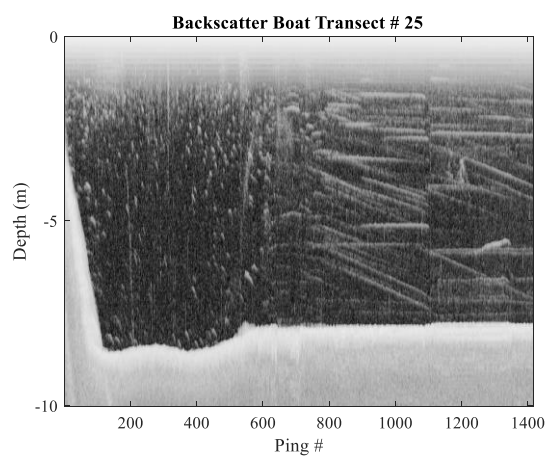

**Figure S2.** Salinity, pH, and ORP depth profiles

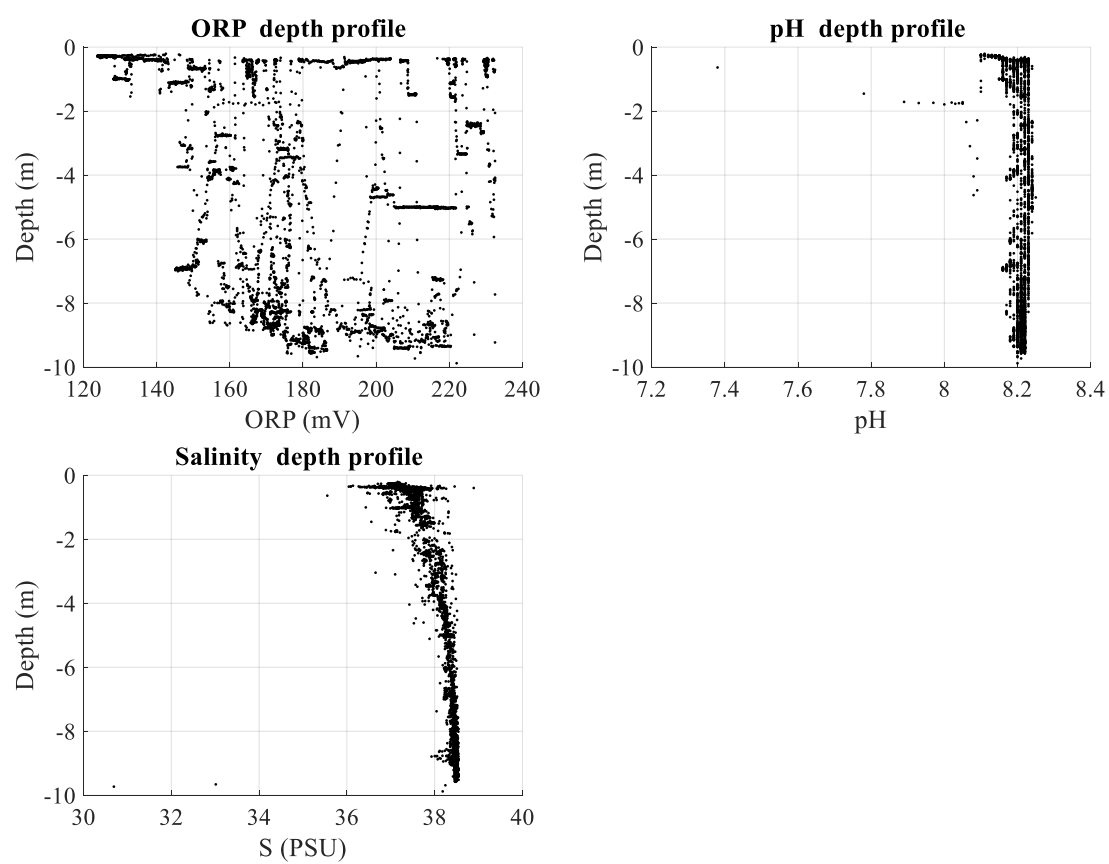

**Figure S3.** Spatial Distribution of environmental parameters split in transects according to Figure 13 (a)

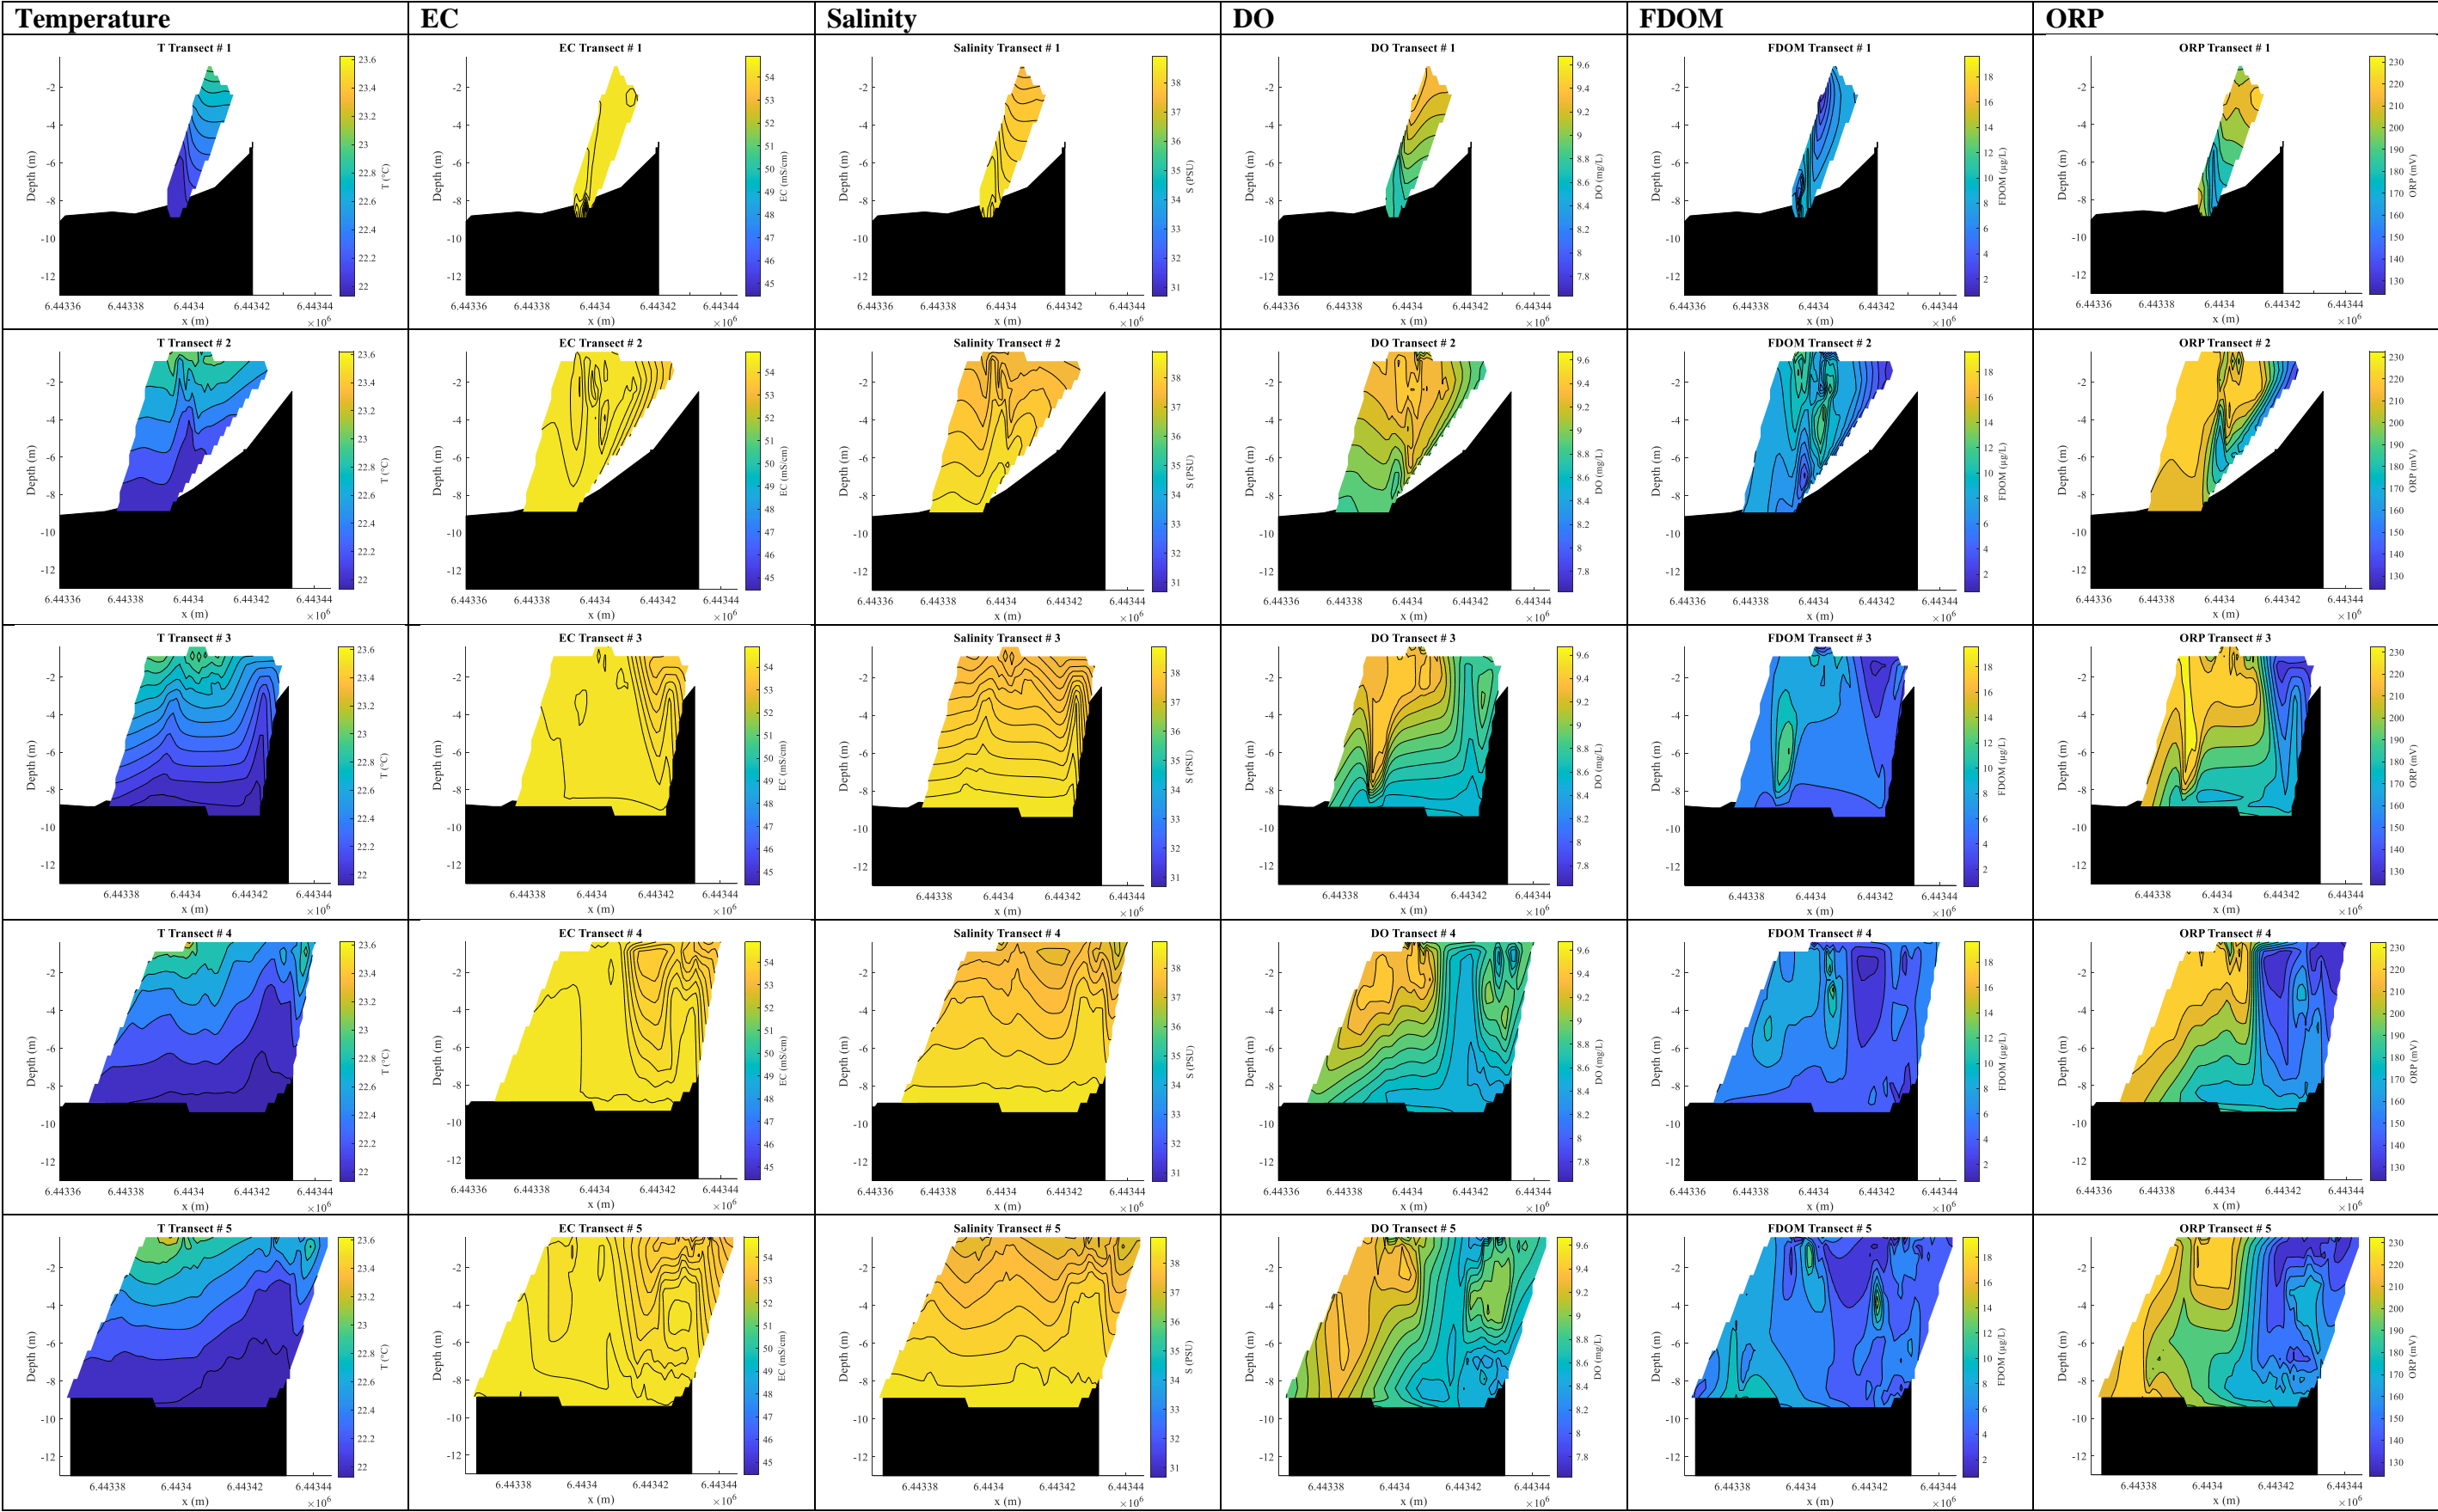

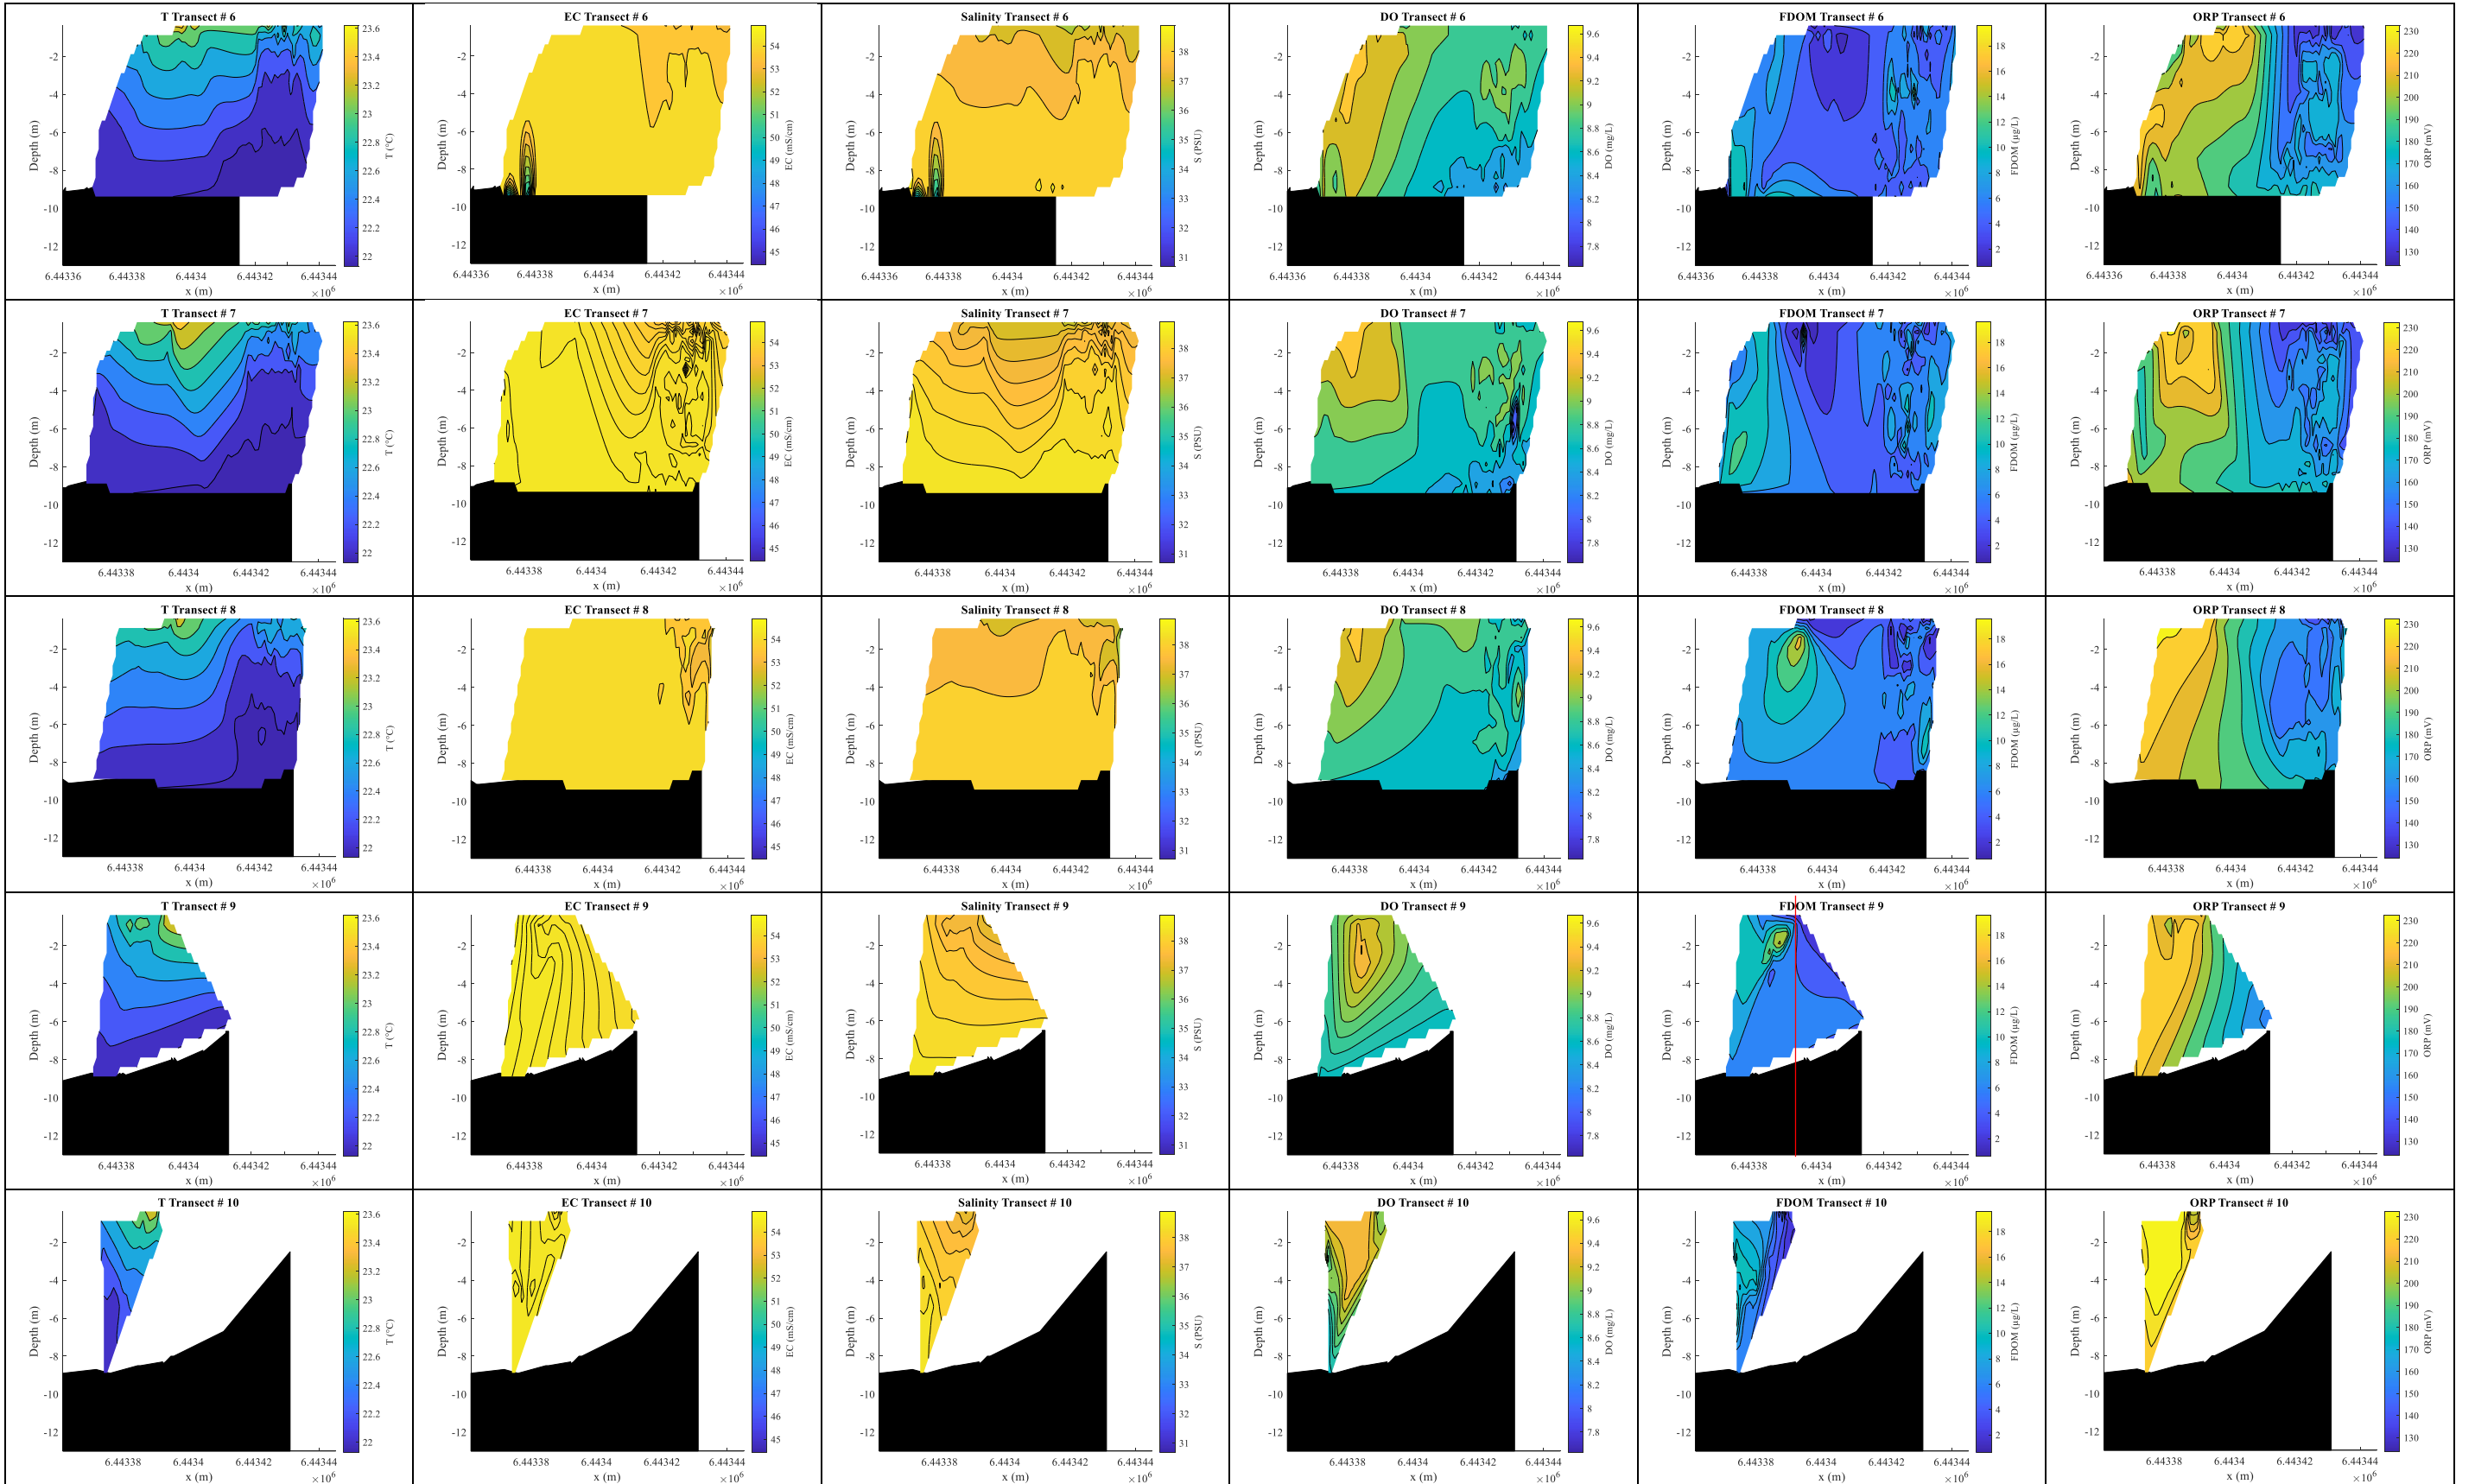

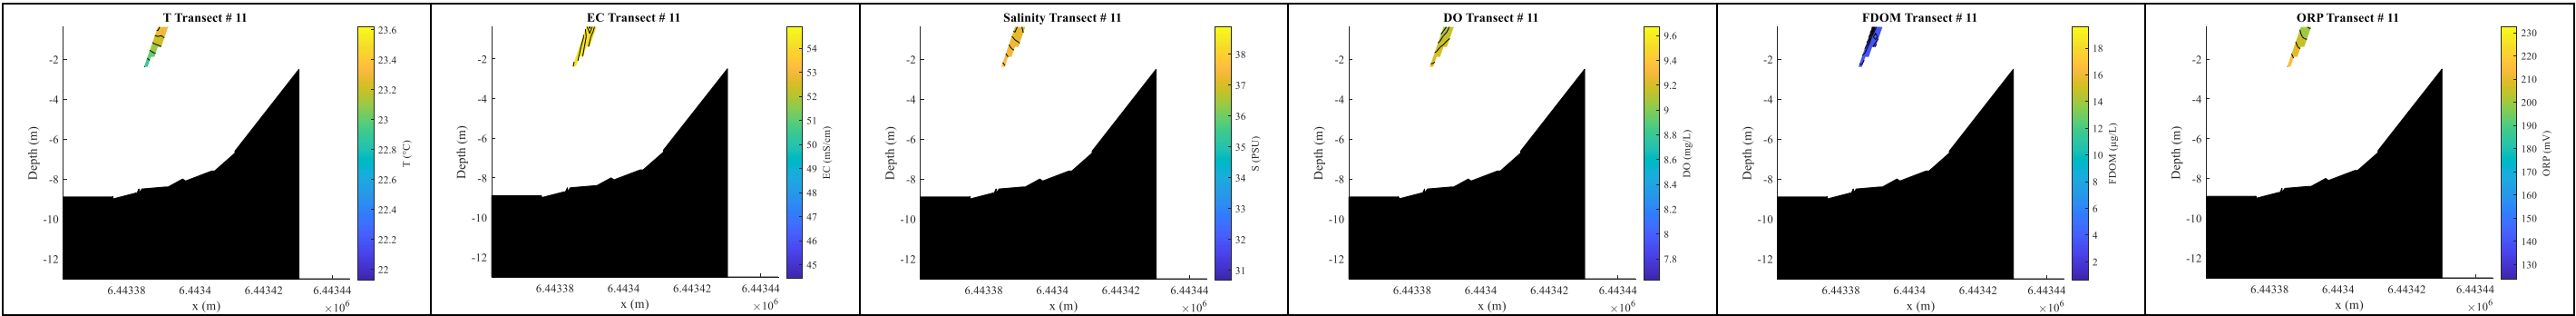

Supplement: s1 [file s1 › jmse-1285361-supplementary.pdf]
