# Supplementary material for: Investigation of the Spatio-Temporal Behaviour of Submarine Groundwater Discharge Using a Low-Cost Multi-Sensor-Platform
Source: MDPI journal article supplement (doi:10.3390/jmse9080802), 2021-07-26
Supplement: s1 [file s1]

Archive with 1 entries (1 files):
- jmse-1285361-supplementary.pdf
